# Supplementary material for: Strain and electric field induced electronic property modifications in two-dimensional Janus SZrAZ2 (A = Si, Ge; Z = P, As) monolayers
Source: Royal Society of Chemistry journal article supplement (doi:10.1039/d3dt02904b), 2023-01-01
Supplement: d3dt02904b1.pdf [file d3dt02904b1.pdf]

## Supporting Information

### Strain and electric field induced electronic properties modifications in two-dimensional Janus SZrAZ<sub>2</sub> (A = Si, Ge; Z= P, As) monolayers

Zhen Gao<sup>a</sup>, YaoHe<sup>a,\*</sup>, and Kai Xiong<sup>b,\*</sup>

<sup>a</sup>*Department of Physics, Yunnan University, Kunming 650091, People's Republic of China.*

<sup>b</sup>*Materials Genome Institute, School of Materials and Energy, Yunnan University, Kunming 650091, P. R. China.*

\*E-mail:

[yhe@ynu.edu.cn](mailto:yhe@ynu.edu.cn); [xiongekai@ynu.edu.cn](mailto:xiongekai@ynu.edu.cn)

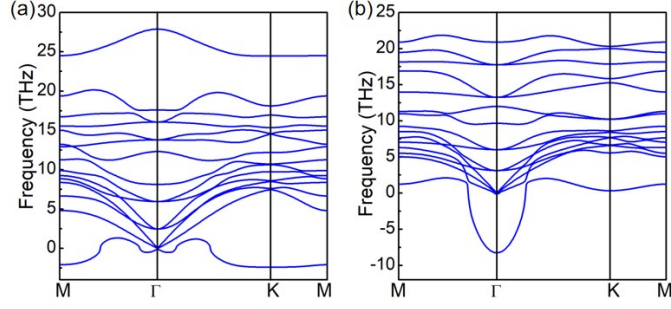

Fig S1 Phonon dispersions of the (a) SZrSiN<sub>2</sub> and (b) SZrGeN<sub>2</sub> monolayers, respectively.

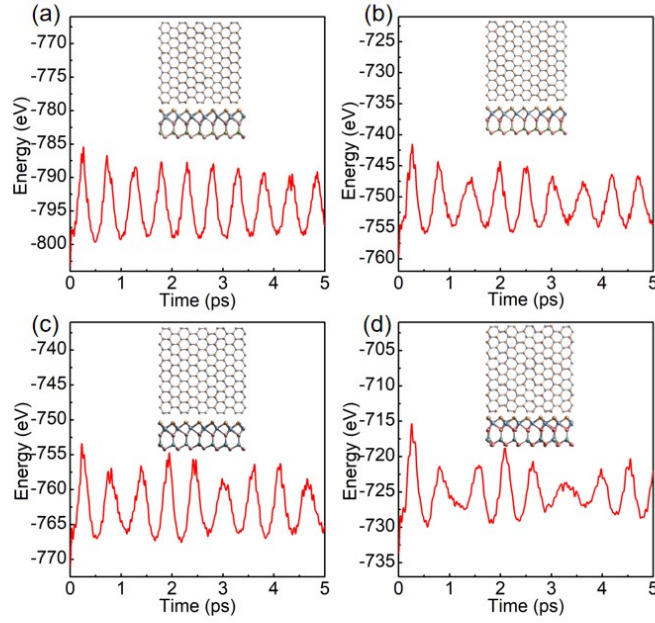

Fig S2 Variation of the energy as a function of time for the Janus (a)SZrSiP<sub>2</sub>, (b)SZrSiAs<sub>2</sub>, (c)SZrGeP<sub>2</sub>, and (d)SMOGeAs<sub>2</sub> monolayers at 500K. The insets are the top and side views of the structure at the end of the AIMD simulation.

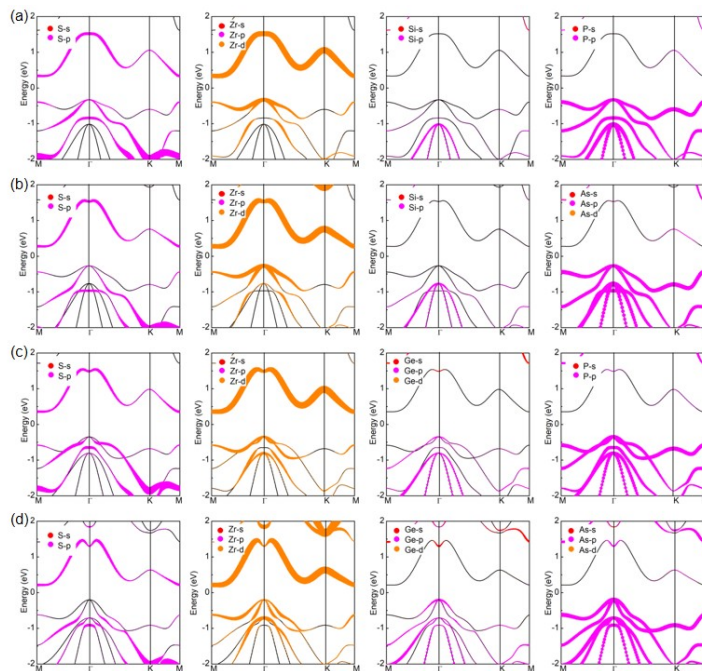

Fig S3 Projected band structure of 2D Janus (a) SZrSiP<sub>2</sub>, (b) SZrSiAs<sub>2</sub>, (c) SZrGeP<sub>2</sub> and (d) SMOGeAs<sub>2</sub> monolayers.

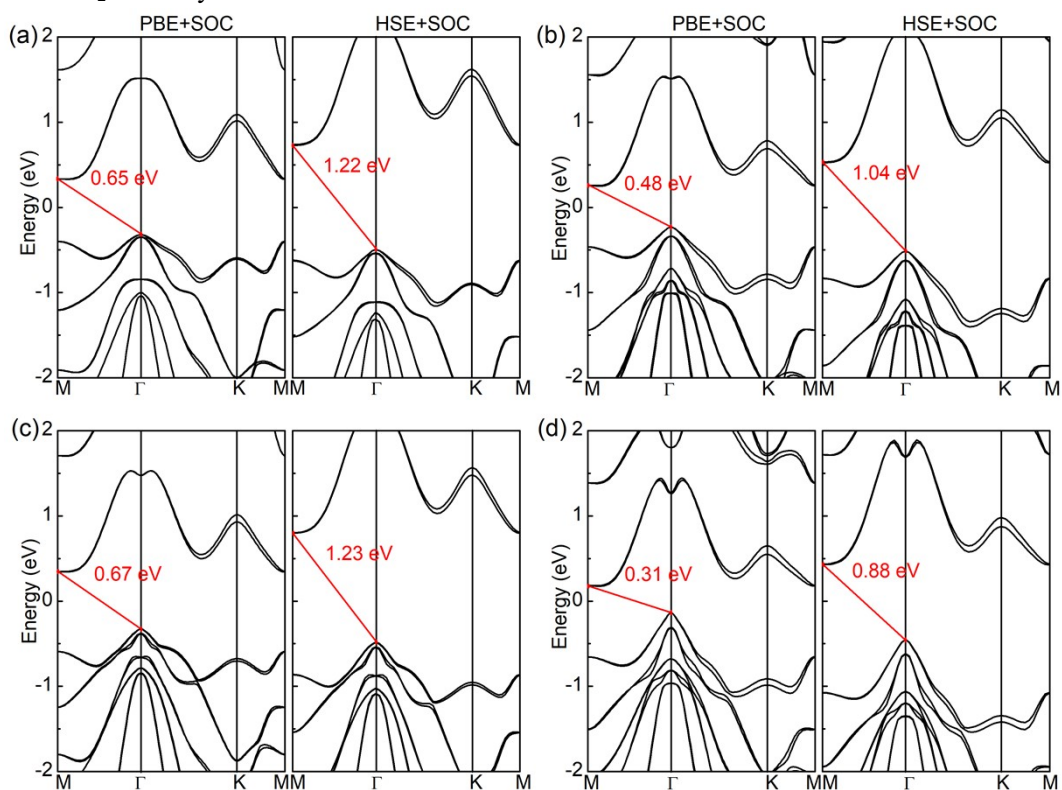

Fig. S4 Electronic band structure of 2D Janus (a) SZrSiP<sub>2</sub>, (b) SZrSiAs<sub>2</sub>, (c) SZrGeP<sub>2</sub>, and (d) SZrGeAs<sub>2</sub> by PBE+SOC and HSE06+SOC methods.

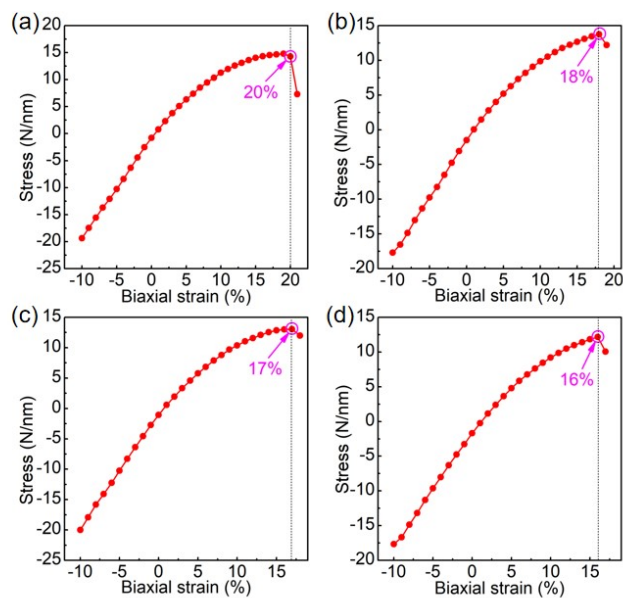

Fig S5 strain-stress curve for 2D Janus (a) SZrSiP<sub>2</sub>, (b) SZrSiAs<sub>2</sub>, (c) SZrGeP<sub>2</sub> and (d) SZrGeAs<sub>2</sub> monolayers.

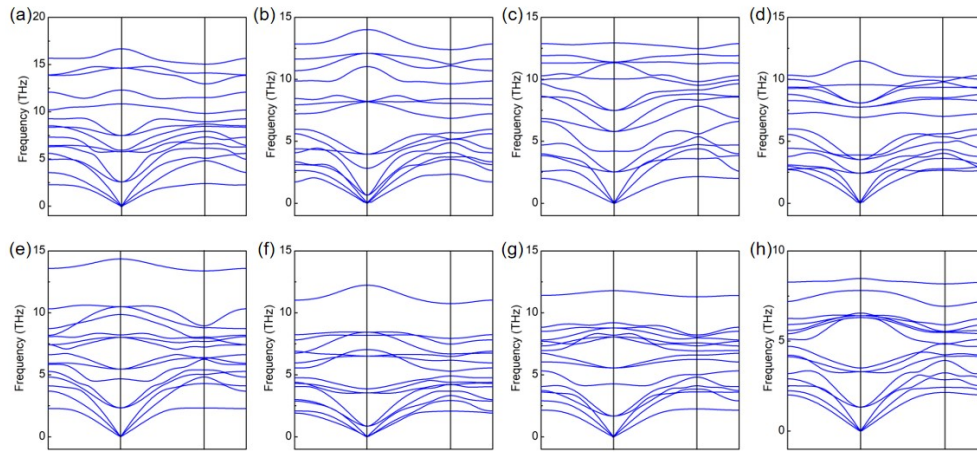

Fig S6 Phonon spectrum of  $\text{SZrSiP}_2$ ,  $\text{SZrSiAs}_2$ ,  $\text{SZrGeP}_2$ , and  $\text{SZrGeAs}_2$  monolayers under strain of (a-d) -10% and (e-h) +10%, respectively.

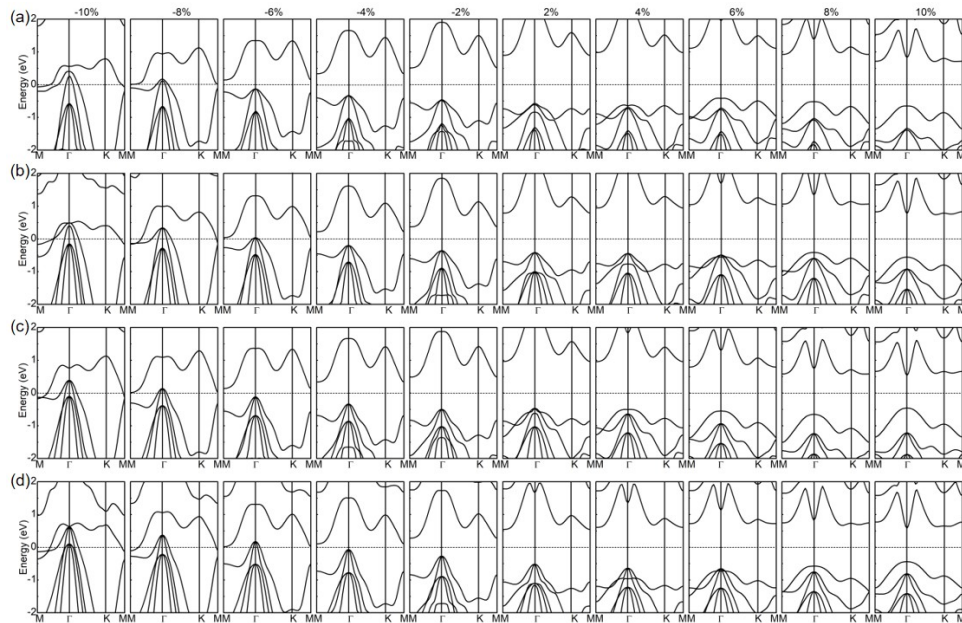

Fig S7 Electronic band structure under biaxial strain of 2D Janus (a)  $\text{SZrSiP}_2$ , (b)  $\text{SZrSiAs}_2$ , (c)  $\text{SZrGeP}_2$ , and (d)  $\text{SZrGeAs}_2$  monolayers.

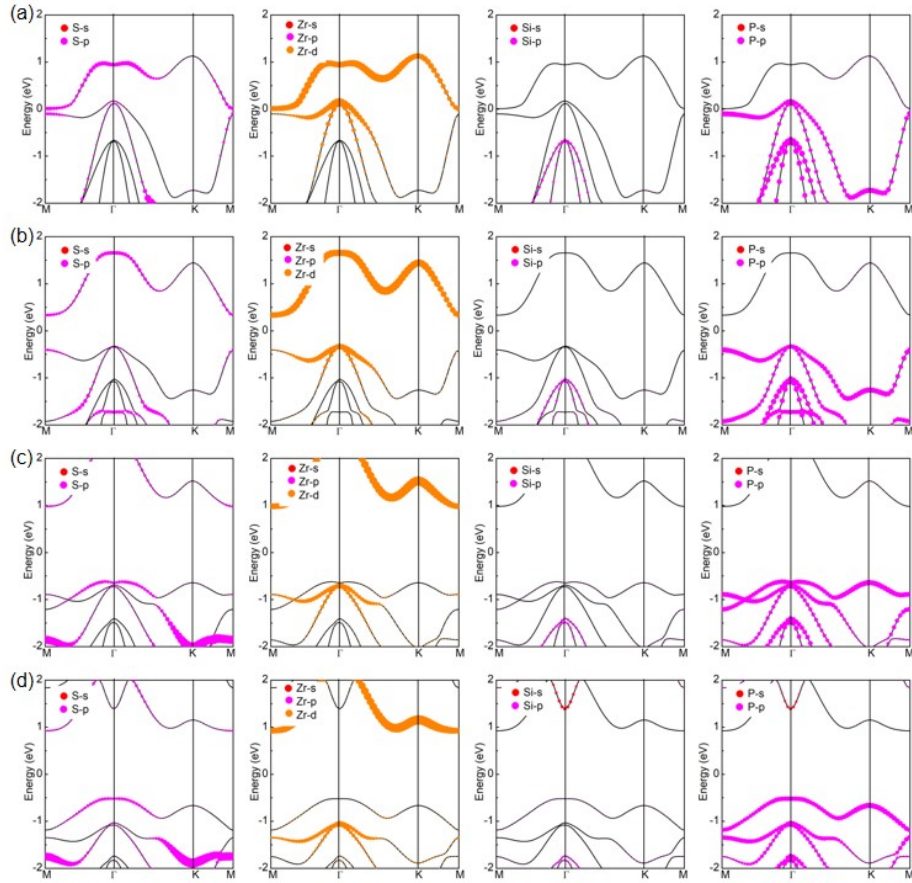

Fig S8 Orbital projected band structures for SZrSiP<sub>2</sub> monolayer under different strengths of different strains of (a) -8%, (b) -4%, (c) 4% and (d) 8%.

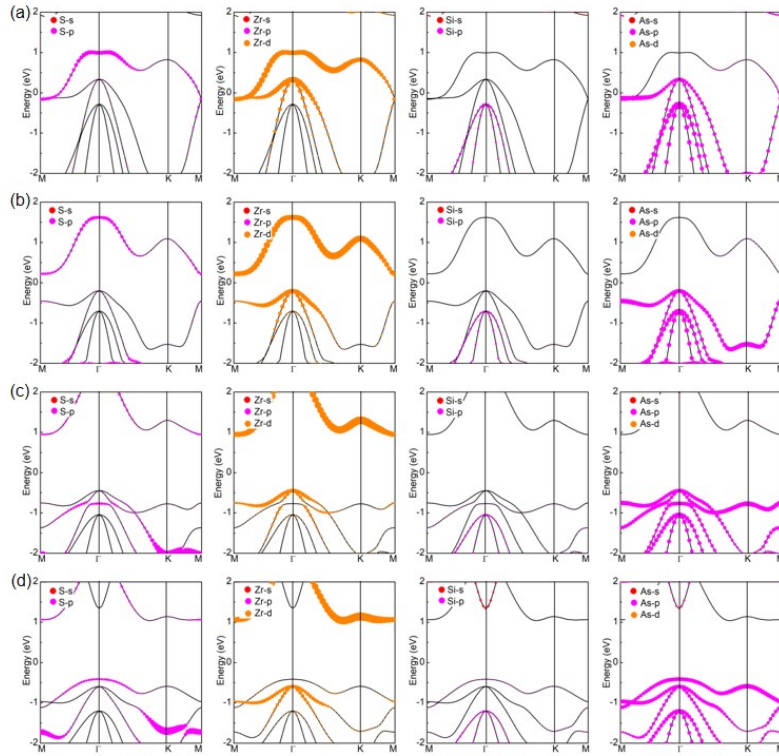

Fig S9 Orbital projected band structures for SZrSiAs<sub>2</sub> monolayer under different strengths of

different strains of (a) -8%, (b) -4%, (c) 4% and (d) 8%.

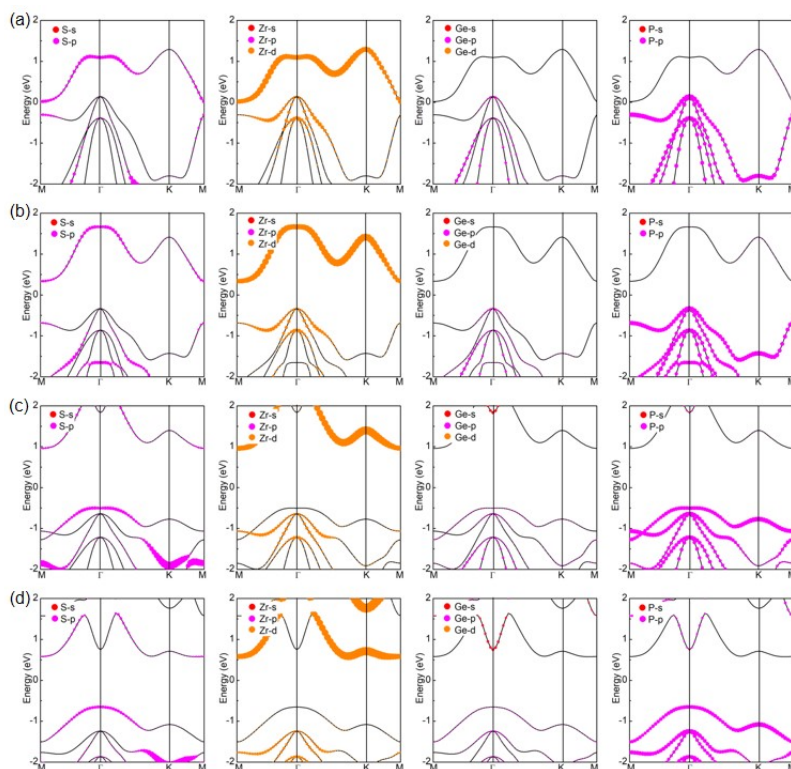

Fig S10 Orbital projected band structures for SZrGeP<sub>2</sub> monolayer under different strengths of different strains of (a) -8%, (b) -4%, (c) 4% and (d) 8%.

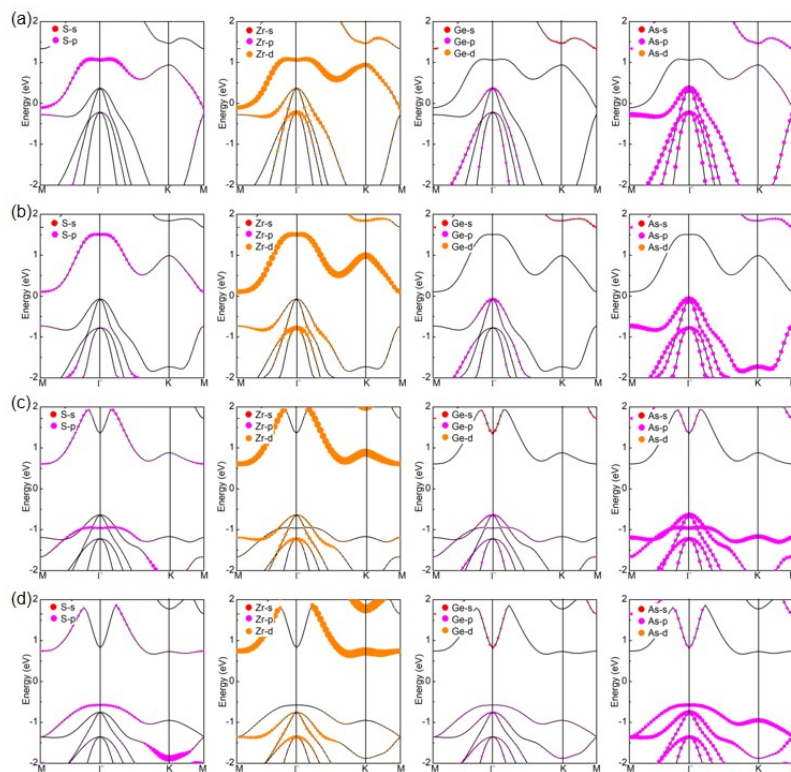

Fig S11 Orbital projected band structures for SZrGeAs<sub>2</sub> monolayer under different strengths of different strains of (a) -8%, (b) -4%, (c) 4% and (d) 8%.

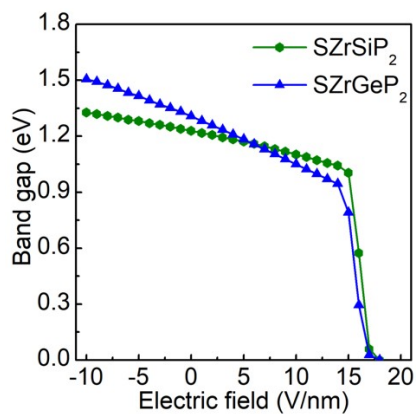

Fig S12 Band gap under external electric field of 2D SZrSiP<sub>2</sub> and SZrGeP<sub>2</sub> by HSE method.

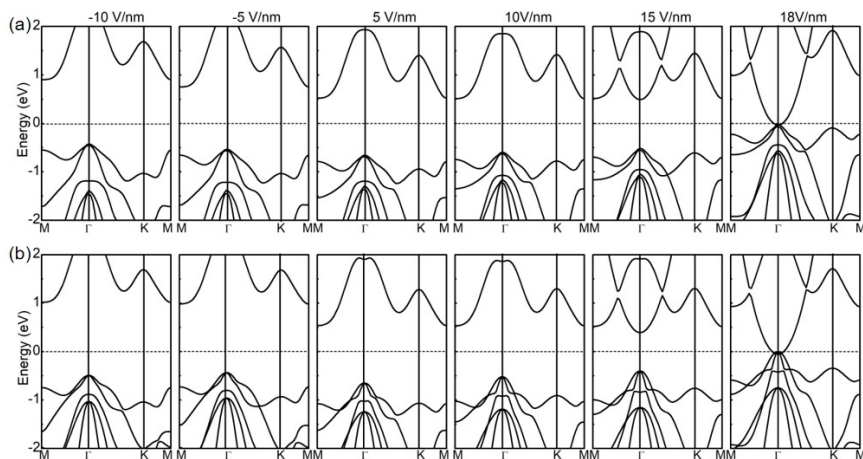

Fig S13 Electronic band structure under electric field of 2D Janus (a) SZrSiP<sub>2</sub>, and (b) SZrGeP<sub>2</sub> monolayers.

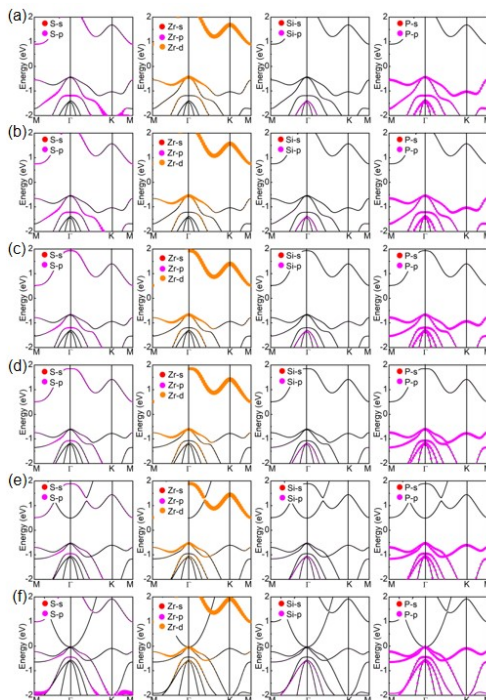

Fig S14 Orbital projected band structures for SZrSiP<sub>2</sub> monolayer under different strengths of different electric field of (a) -10V/nm, (b) -5V/nm, (c) +5V/nm, (d) +10V/nm, (e) +15V/nm and (f)

+18V/nm.

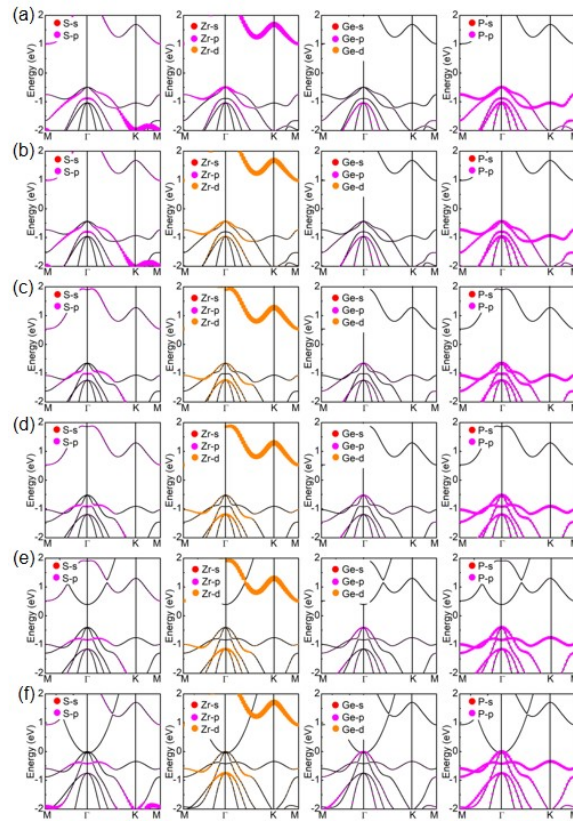

Fig S15 Orbital projected band structures for SZrGeP<sub>2</sub> monolayer under different strengths of different electric field of (a) -10V/nm, (b) -5V/nm, (c) +5V/nm, (d) +10V/nm, (e) +15V/nm and (f) +18V/nm.

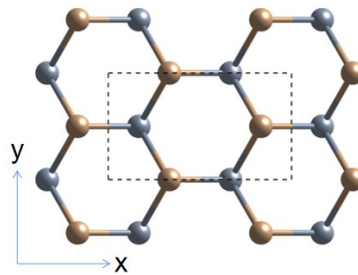

Fig S16 The calculation of carrier mobility is carried out in rectangular cell in the black dotted box, the x and y directions also been indicate.



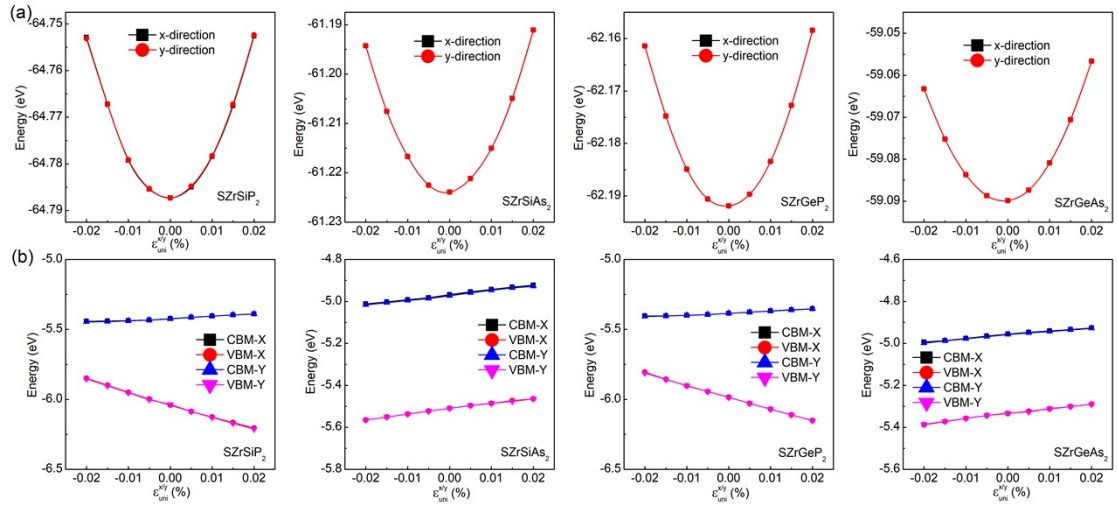

Fig S17 The uniaxial strain  $\epsilon_{uni}^{x/y}$  (a) dependent energy shifting (b) CBM/VBM positions (b) of SZrAZ<sub>2</sub> along the two transport directions x and y. The fitting curves are presented by the solid lines.
